*Supporting Information*

**A zebrafish model of manganism reveals reversible and treatable symptoms that are independent of neurotoxicity**

*Subha Bakthavatsalam<sup>†</sup>, Shreya Das Sharma<sup>‡</sup>, Mahendra Sonawane<sup>§</sup>, Vatsala Thirumalai<sup>‡\*</sup>, and Ankona Datta<sup>†\*</sup>*

<sup>†</sup> Department of Chemical Sciences, Tata Institute of Fundamental Research, 1 Homi Bhabha Road, Colaba, Mumbai-400005, India

<sup>‡</sup> National Centre for Biological Sciences, GKVK, Bellary Road, Bangalore-560065, India

<sup>§</sup> Department of Biological Sciences, Tata Institute of Fundamental Research, 1 Homi Bhabha Road, Colaba, Mumbai-400005, India

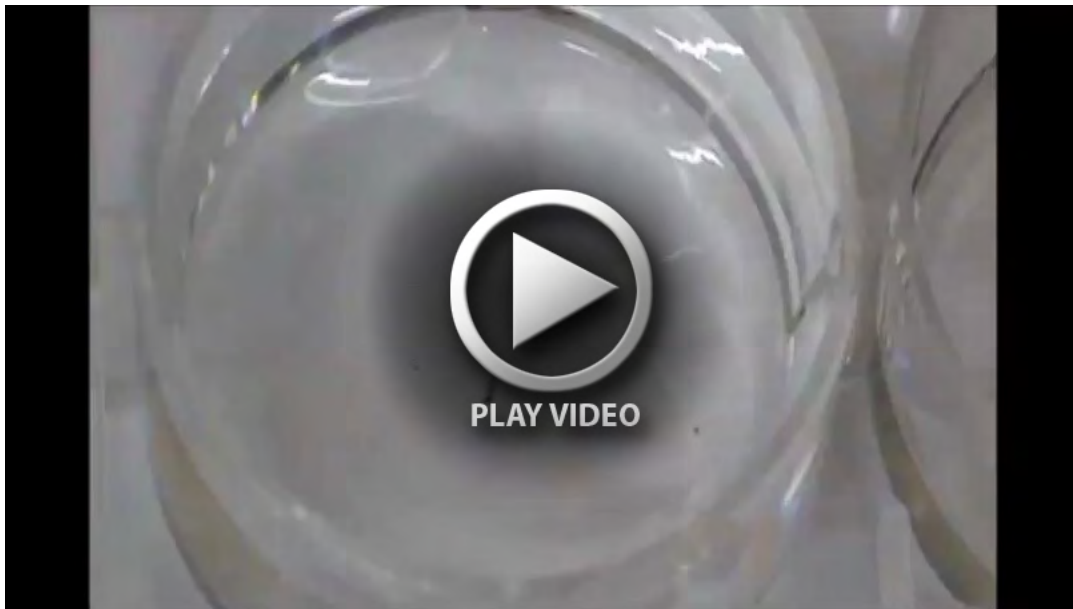

Movie S1: **Circular swimming pattern displayed by 0.8 mM Mn treated larvae (5 dpf) in response to tap at the edge of the well.**

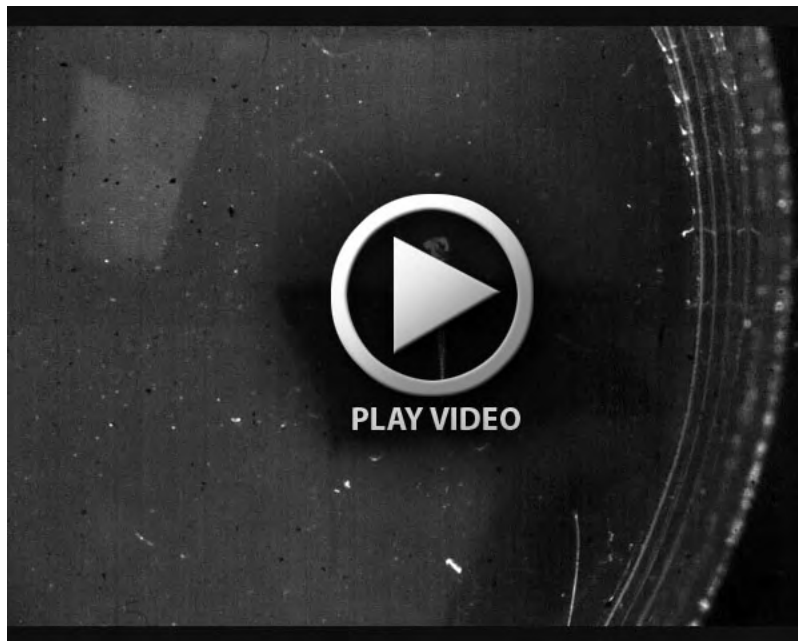

Movie S2: **High speed video recording of agarose embedded larvae.** Wagging movement from a control larvae as seen at 300 fps.

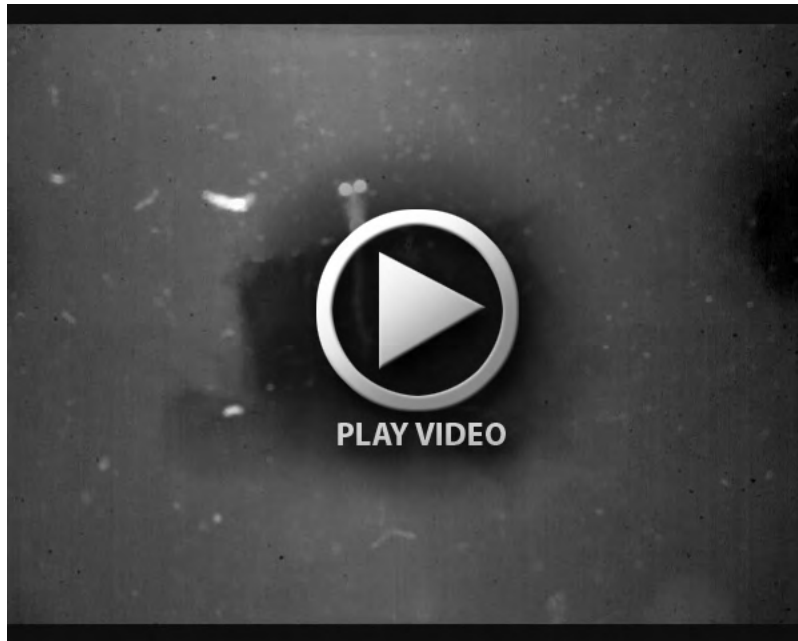

Movie S3: **High speed video recording of agarose embedded larvae.** Large angle movement (two right LAMs in quick succession) exhibited by control larvae as seen at 300 fps.

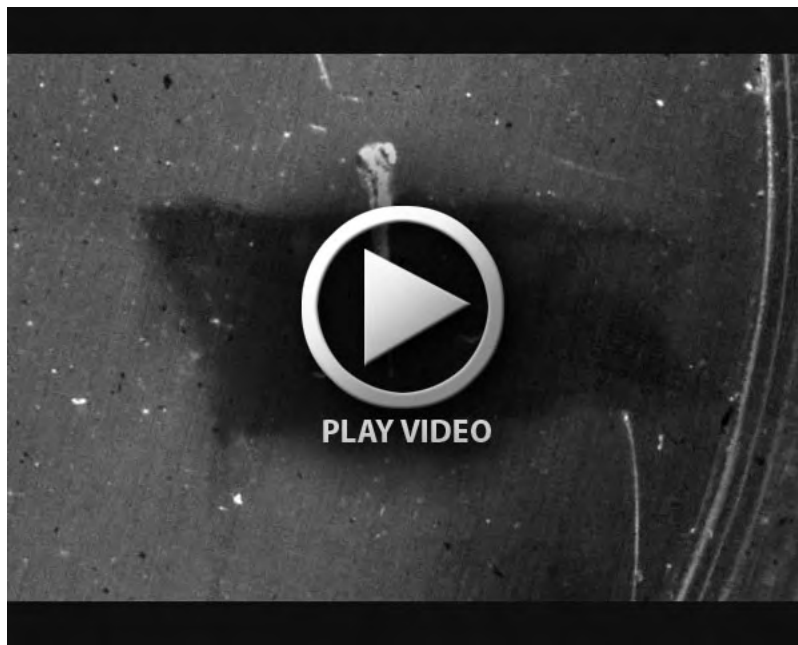

Movie S4: **High speed video recording of agarose embedded larvae.** Large angle movement (one right LAM) exhibited by Mn treated larvae as seen at 300 fps.
